# Supplementary material
Source: PubMed Central journal article supplement (PMC3928659)
Supplement: mmc1.pdf [file mmc1.pdf]

The American Journal of Human Genetics, Volume 94

## **Supplemental Data**

### **Causal Effects of Body Mass Index**

#### **on Cardiometabolic Traits and Events:**

### **A Mendelian Randomization Analysis**

**Michael V. Holmes, Leslie A. Lange, Tom Palmer, Matthew B. Lanktree, Kari E. North, Berta Almoguera, Sarah Buxbaum, Hareesh R. Chandrupatla, Clara C. Elbers, Yiran Guo, Ron C. Hoogeveen, Jin Li, Yun R. Li, Daniel I. Swerdlow, Mary Cushman, Tom S. Price, Sean P. Curtis, Myriam Fornage, Hakon Hakonarson, Sanjay R. Patel, Susan Redline, David S. Siscovick, Michael Y. Tsai, James G. Wilson, Yvonne T. van der Schouw, Garret A. FitzGerald, Aroon D. Hingorani, Juan P. Casas, Paul I.W. de Bakker, Stephen S. Rich, Eric E. Schadt, Folkert W. Asselbergs, Alex P. Reiner, and Brendan J. Keating**

## Supplemental Acknowledgments

Dr Holmes was funded by a UK MRC Population Health Scientist Fellowship (G0802432). Dr Asselbergs is supported by UCL Hospitals NIHR Biomedical Research Centre.

**CARe** wishes to acknowledge the support of the National Heart, Lung and Blood Institute and the contributions of the research institutions, study investigators, field staff, and study participants in creating this resource for biomedical research (NHLBI contract number HHSN268200960009C).

**ARIC:** The Atherosclerosis Risk in Communities Study is carried out as a collaborative study supported by National Heart, Lung, and Blood Institute contracts (HHSN268201100005C, HHSN268201100006C, HHSN268201100007C, HHSN268201100008C, HHSN268201100009C, HHSN268201100010C, HHSN268201100011C, and HHSN268201100012C), R01HL087641, R01HL59367 and R01HL086694; National Human Genome Research Institute contract U01HG004402; and National Institutes of Health contract HHSN268200625226C. The authors thank the staff and participants of the ARIC study for their important contributions. Infrastructure was partly supported by Grant Number UL1RR025005, a component of the National Institutes of Health and NIH Roadmap for Medical Research; **CARDIA:** Coronary Artery Risk in Young Adults: University of Alabama at Birmingham (N01-HC-48047, N01-HC-95095), University of Minnesota (N01-HC-48048), Northwestern University (N01-HC-48049), Kaiser Foundation Research Institute (N01-HC-48050), Tufts-New England Medical Center (N01-HC-45204), Wake Forest University (N01-HC-45205), Harbor-UCLA Research and Education Institute (N01-HC-05187), University of California, Irvine (N01-HC-45134, N01-HC-95100); **CFS:** The Cleveland Family Study (CFS) participants consists of first or selected second-degree relatives of a proband with either laboratory diagnosed obstructive sleep apnea or neighborhood control of an affected proband. Families were selected for genotyping on the basis of genetic informativity, including multigenerational data or individuals from the extremes of the distribution of apnea phenotype. This cohort was genotyped as part of the National Heart Lung and Blood Institute's (NHLBI) Candidate Gene Association Resource (CARe) (Musunuru, K., Lettre, G., Young, T., Farlow, D.N., Pirruccello, J.P., Ejebe, K.G., Keating, B.J., Yang, Q., Chen, M.H., Lapchyk, N. et al. Candidate gene association resource (CARe): design, methods, and proof of concept. *Circ. Cardiovasc. Genet*, 3, 267-275.); **CHS:** This research was supported by contracts HHSN268201200036C, N01HC85239, N01 HC55222, N01HC85079, N01HC85080, N01HC85081, N01HC85082, N01HC85083, N01HC85086, and grant HL080295 from the National Heart, Lung, and Blood Institute (NHLBI), with additional contribution from the National Institute of Neurological Disorders and Stroke (NINDS). Additional support was provided by AG023629 from the National Institute on Aging (NIA). A full list of principal CHS investigators and institutions can be found at <http://www.chs-nhlbi.org/pubs/PubAcknowGuidelines.htm>; **FHS:** The Framingham Heart Study began in 1948 with the recruitment of an original cohort of 5,209 men and women (mean age 44 years; 55 percent women). In 1971 a second generation of study participants was enrolled; this cohort consisted of 5,124 children and spouses of children of the original cohort. The

mean age of the offspring cohort was 37 years; 52 percent were women. A third generation cohort of 4,095 children of offspring cohort participants (mean age 40 years; 53 percent women) was enrolled beginning in 2002. At each clinic visit, a medical history was obtained with a focus on cardiovascular content, and participants underwent a physical examination including measurement of height and weight from which BMI was calculated; **MESA**: The Multi-Ethnic Study of Atherosclerosis Study (MESA) is a multicenter prospective cohort study initiated to study the development of subclinical cardiovascular disease. A total of 6814 women and men between the age of 45 and 84 year were recruited for the first examination between 2000 and 2002. Participants were recruited in six US cities (Baltimore, MD; Chicago, IL; Forsyth County, NC; Los Angeles County, CA; Northern Manhattan, NY; and St. Paul, MN). This study was approved by the institutional review boards of each study site, and written informed consent was obtained from all participants. This cohort was genotyped as part of the National Heart Lung and Blood Institute's (NHLBI) Candidate Gene Association Resource (CARE) (Musunuru, K., Lettre, G., Young, T., Farlow, D.N., Pirruccello, J.P., Ejebe, K.G., Keating, B.J., Yang, Q., Chen, M.H., Lapchyk, N. et al. Candidate gene association resource (CARE): design, methods, and proof of concept. *Circ. Cardiovasc. Genet*, 3, 267-275.); **WHI**: The WHI program is funded by the National Heart, Lung, and Blood Institute, National Institutes of Health, U.S. Department of Health and Human Services through contracts HHSN268201100046C, HHSN268201100001C, HHSN268201100002C, HHSN268201100003C, HHSN268201100004C, and HHSN271201100004C. A listing of WHI investigators can be found at <https://cleo.whi.org/researchers/Documents%20%20Write%20a%20Paper/WHI%20Investigator%20Short%20List.pdf>.

**Figure S1. Identification of previous Mendelian randomization studies investigating the causal role of BMI for cardiometabolic traits**

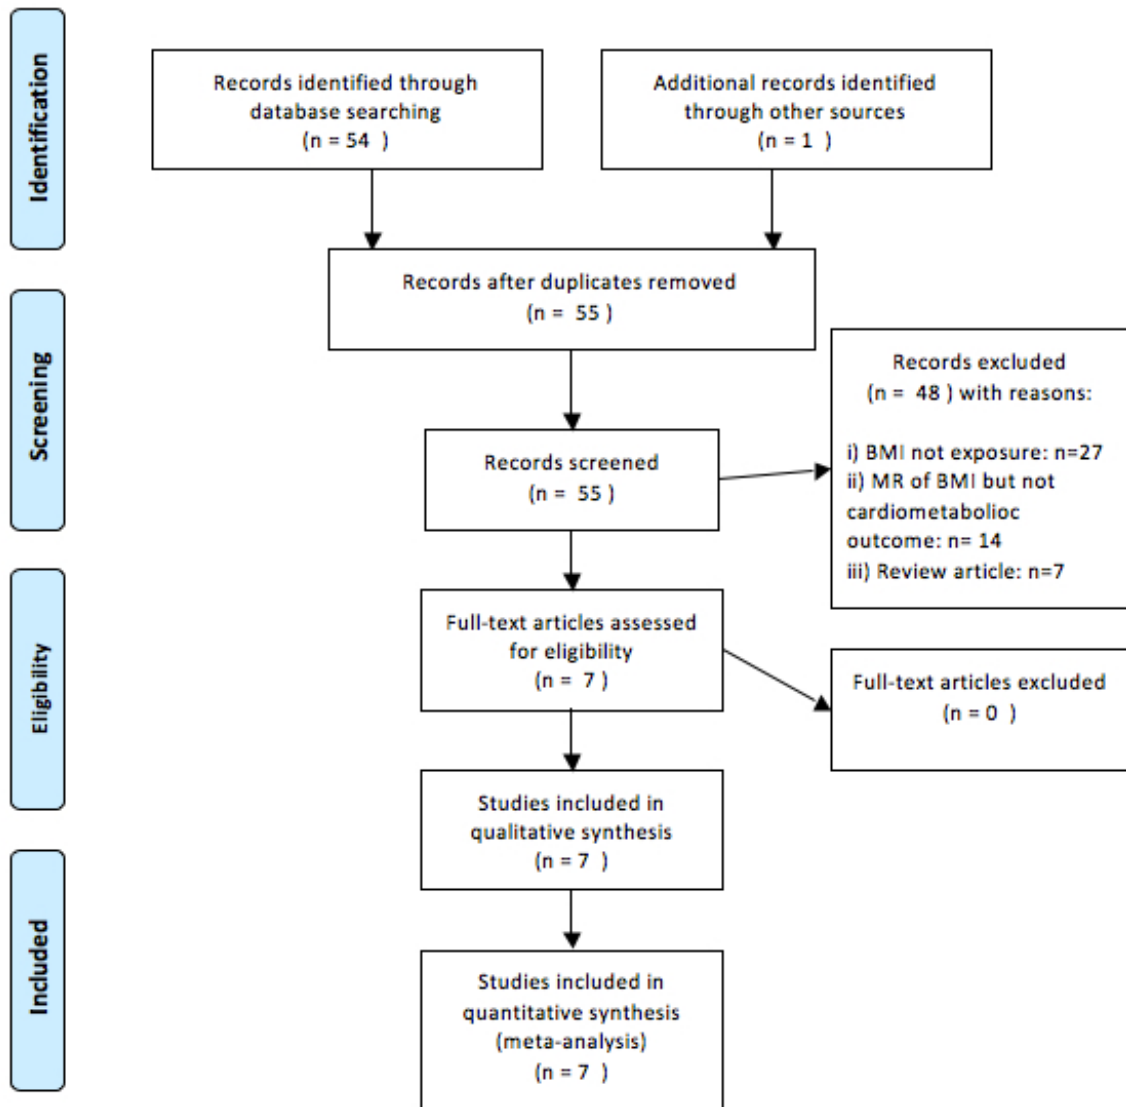

**Figure S2. Allele frequencies of the 14 SNPs comprising the BMI genetic score in the collaborating studies**

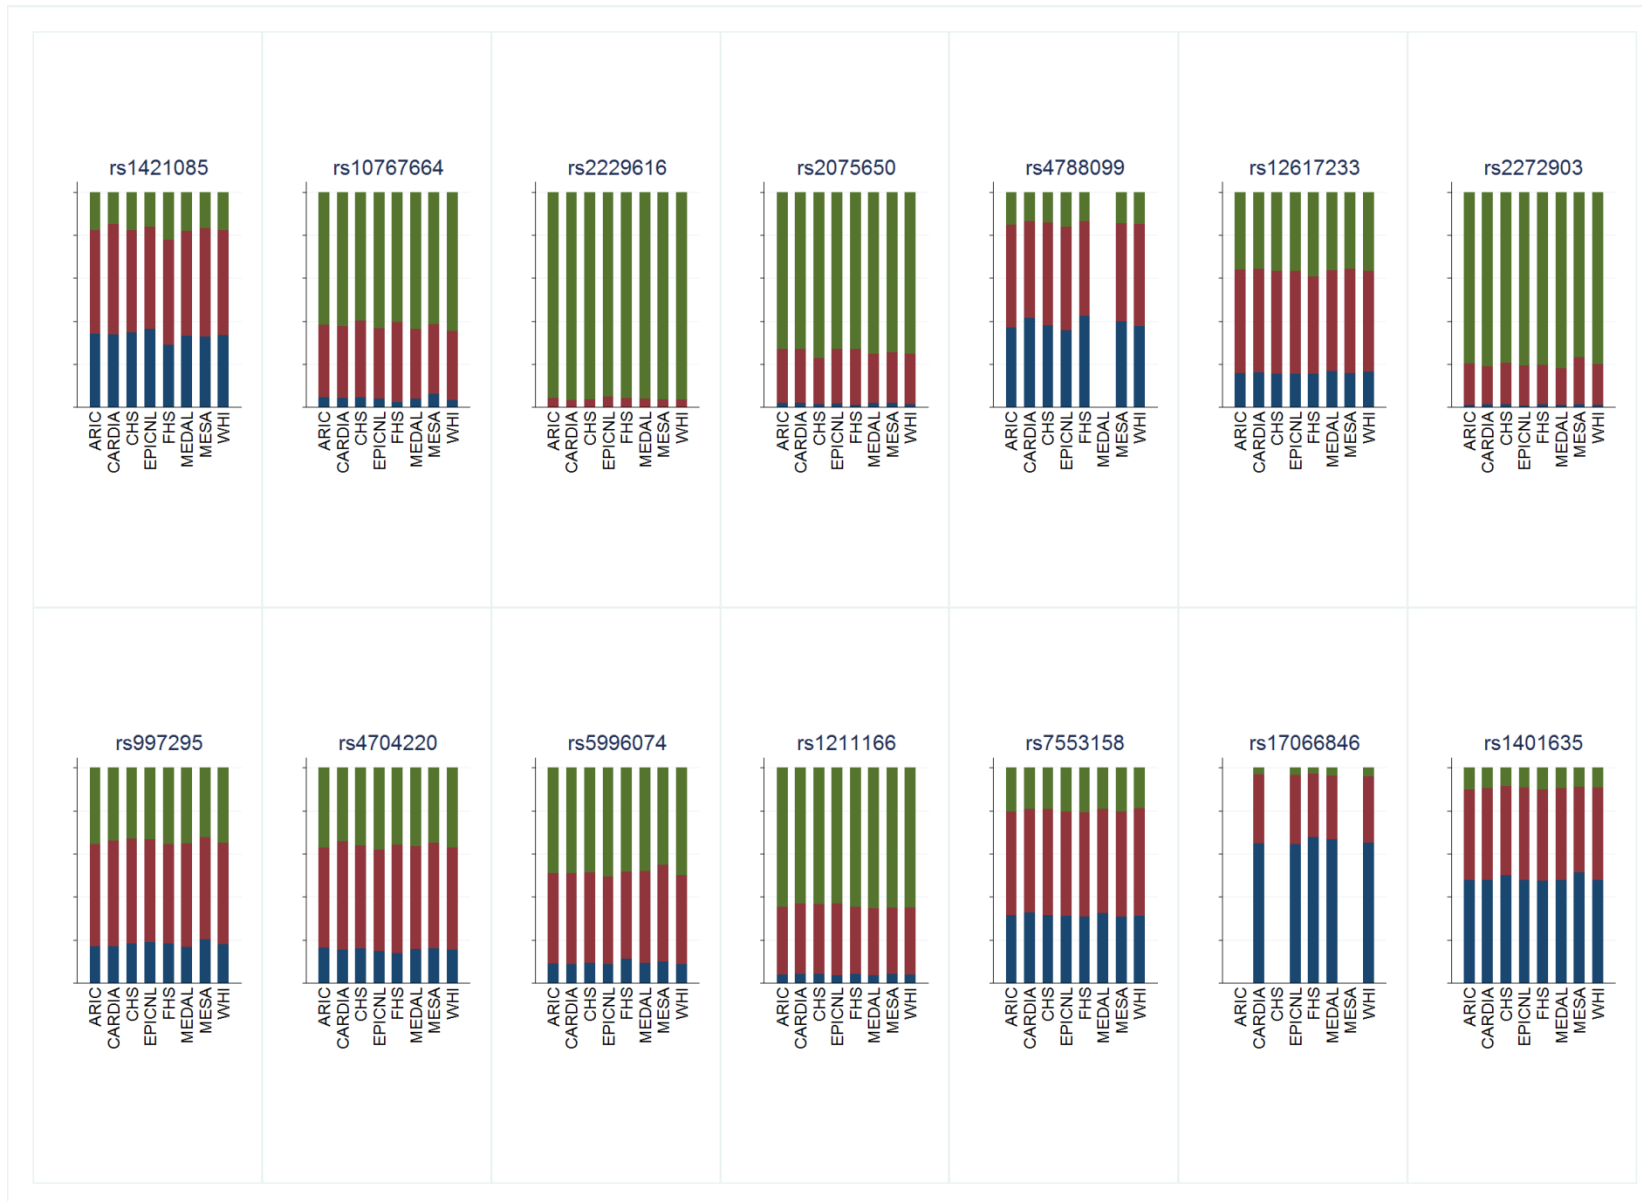

Figure S3. Histogram of weighted BMI genetic score in each study.

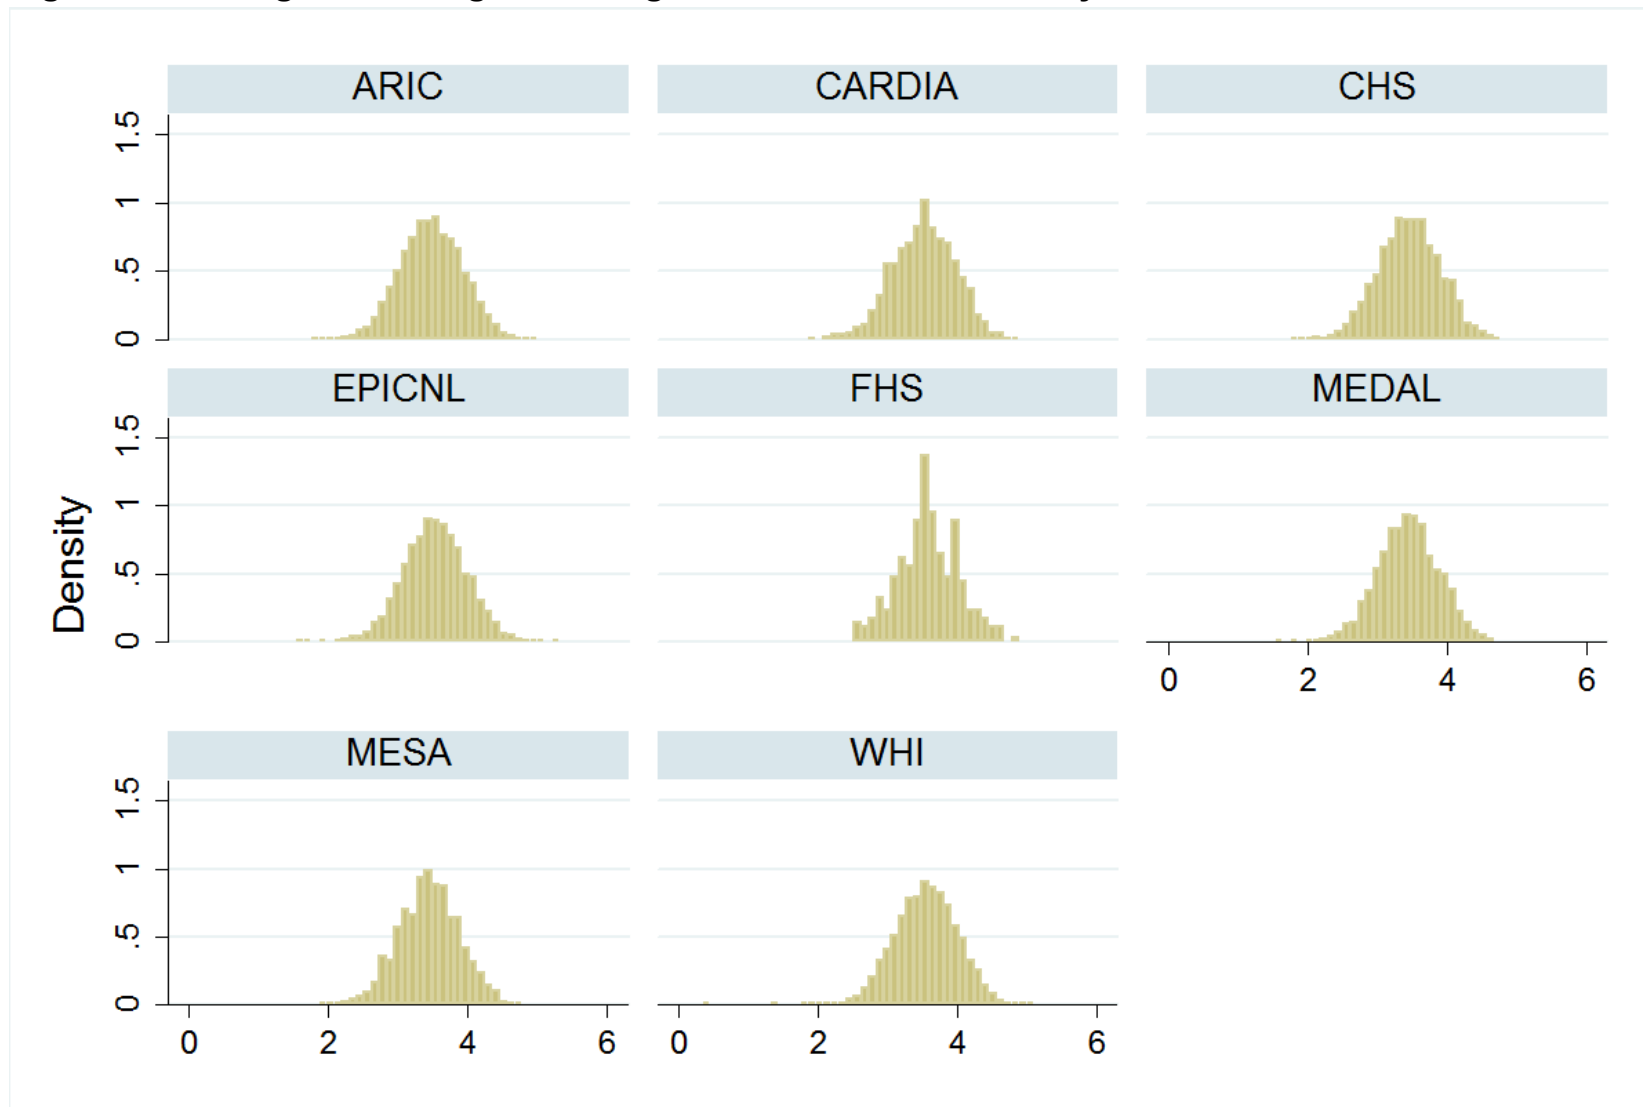

**Figure S4. Meta-analysis pooled estimates of the association between each SNP in the genetic score and BMI.**

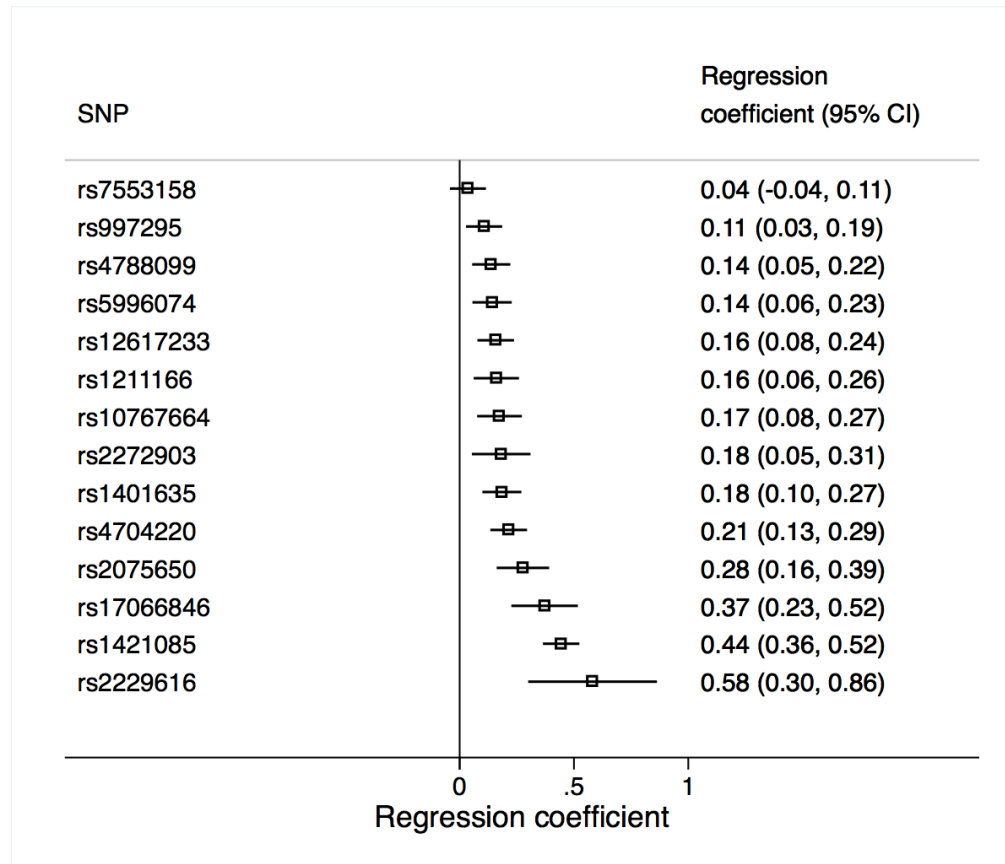

Legend: regression coefficients represent the per-allele difference in BMI ( $\text{kg}/\text{m}^2$ ) for each SNP.

**Figure S5. Pair-wise association plots of the 14 SNPs in the BMI genetic score with each cardiometabolic trait. P-values derived from meta-regression.**

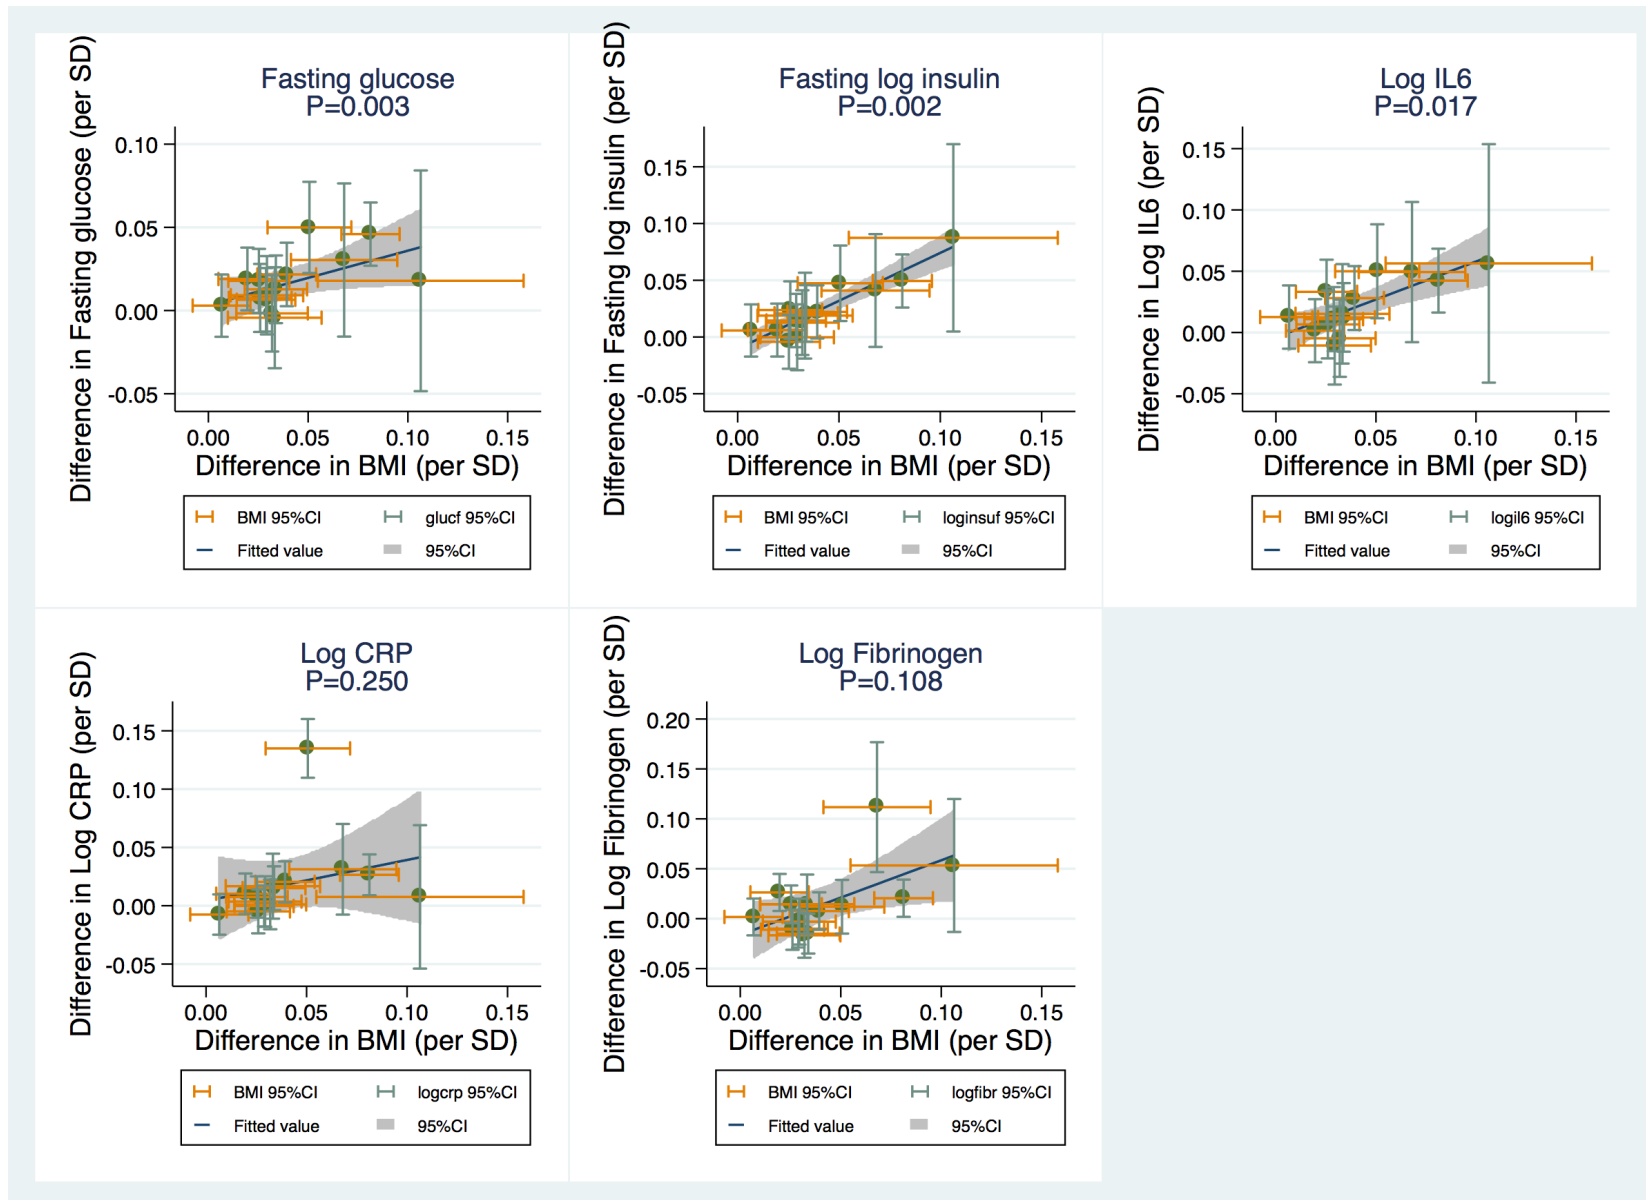



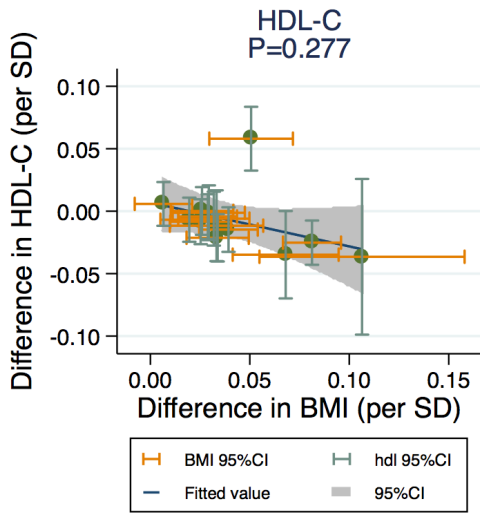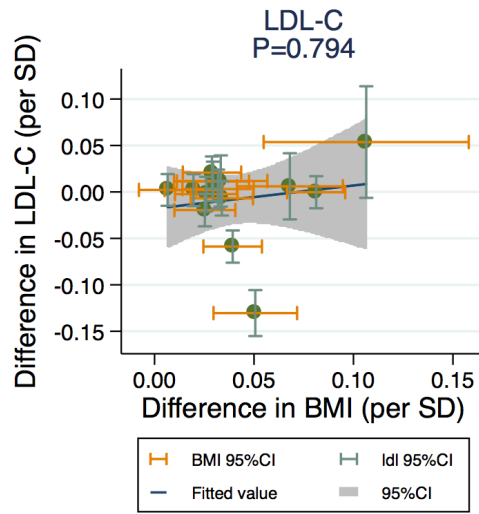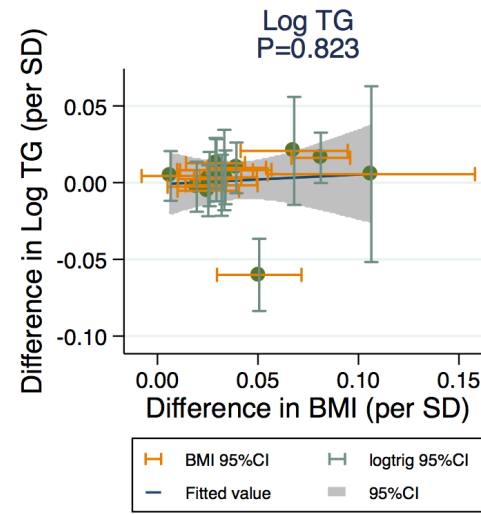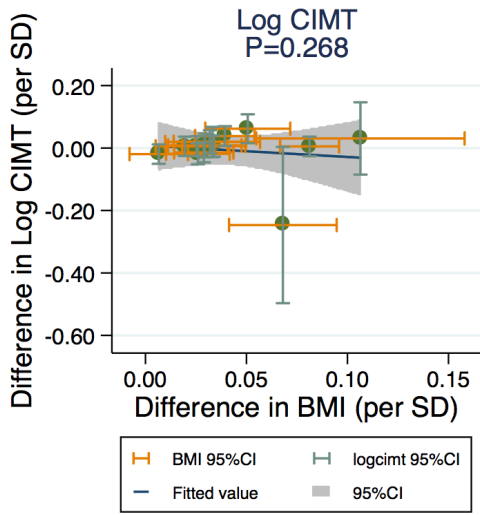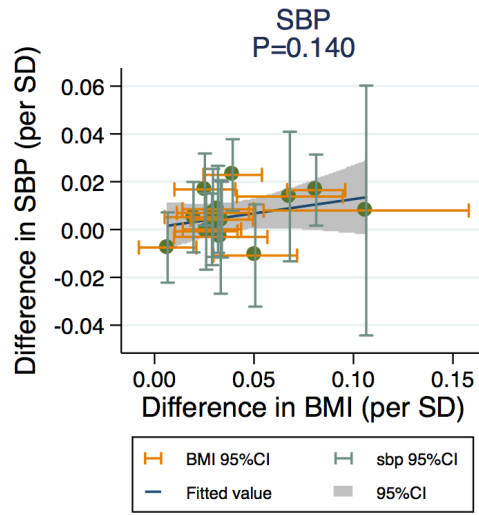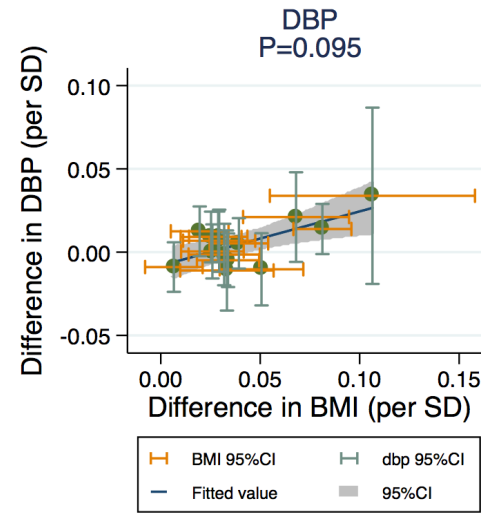

Figure S6. Pair-wise association plots of the 14 SNPs in the BMI genetic score with cardiometabolic events.

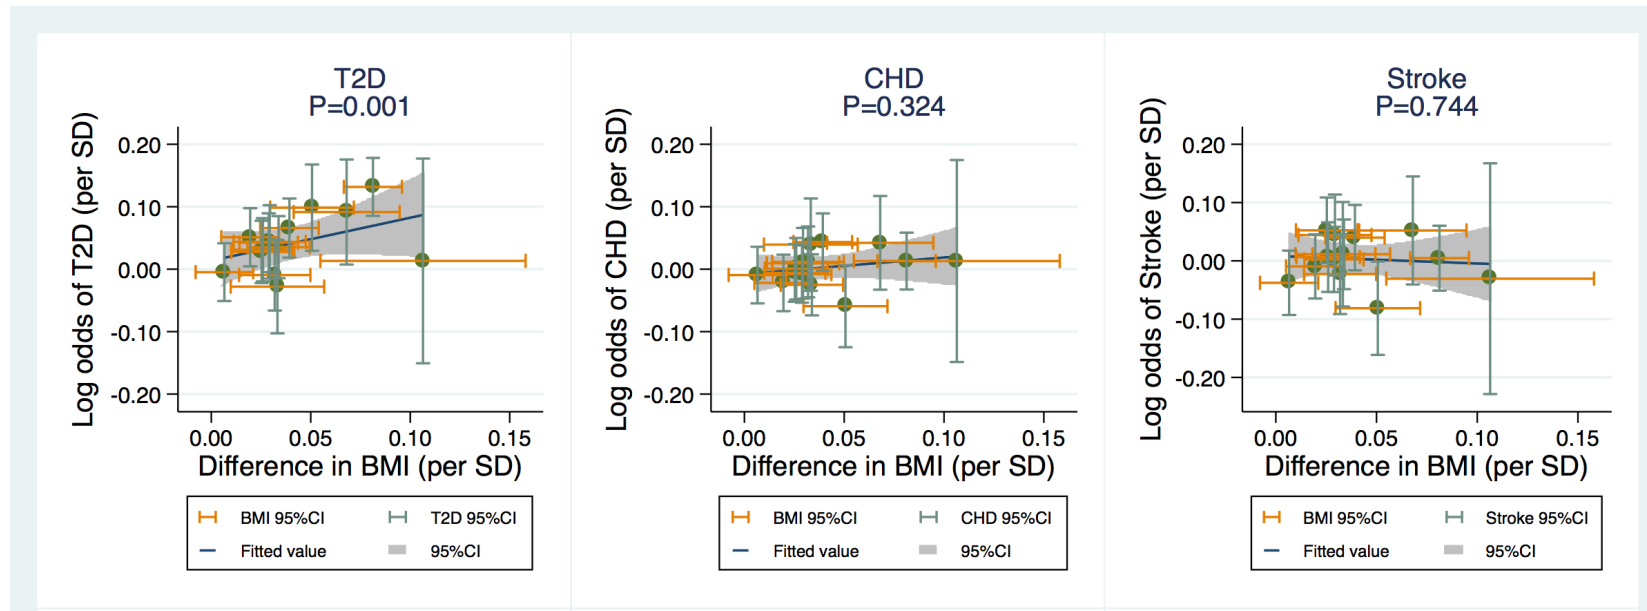

Legend: P-values derived from meta-regression.

**Figure S7. Association of the individual SNPs comprising the BMI genetic score with coronary heart disease (CHD) and type 2 diabetes (T2D).**

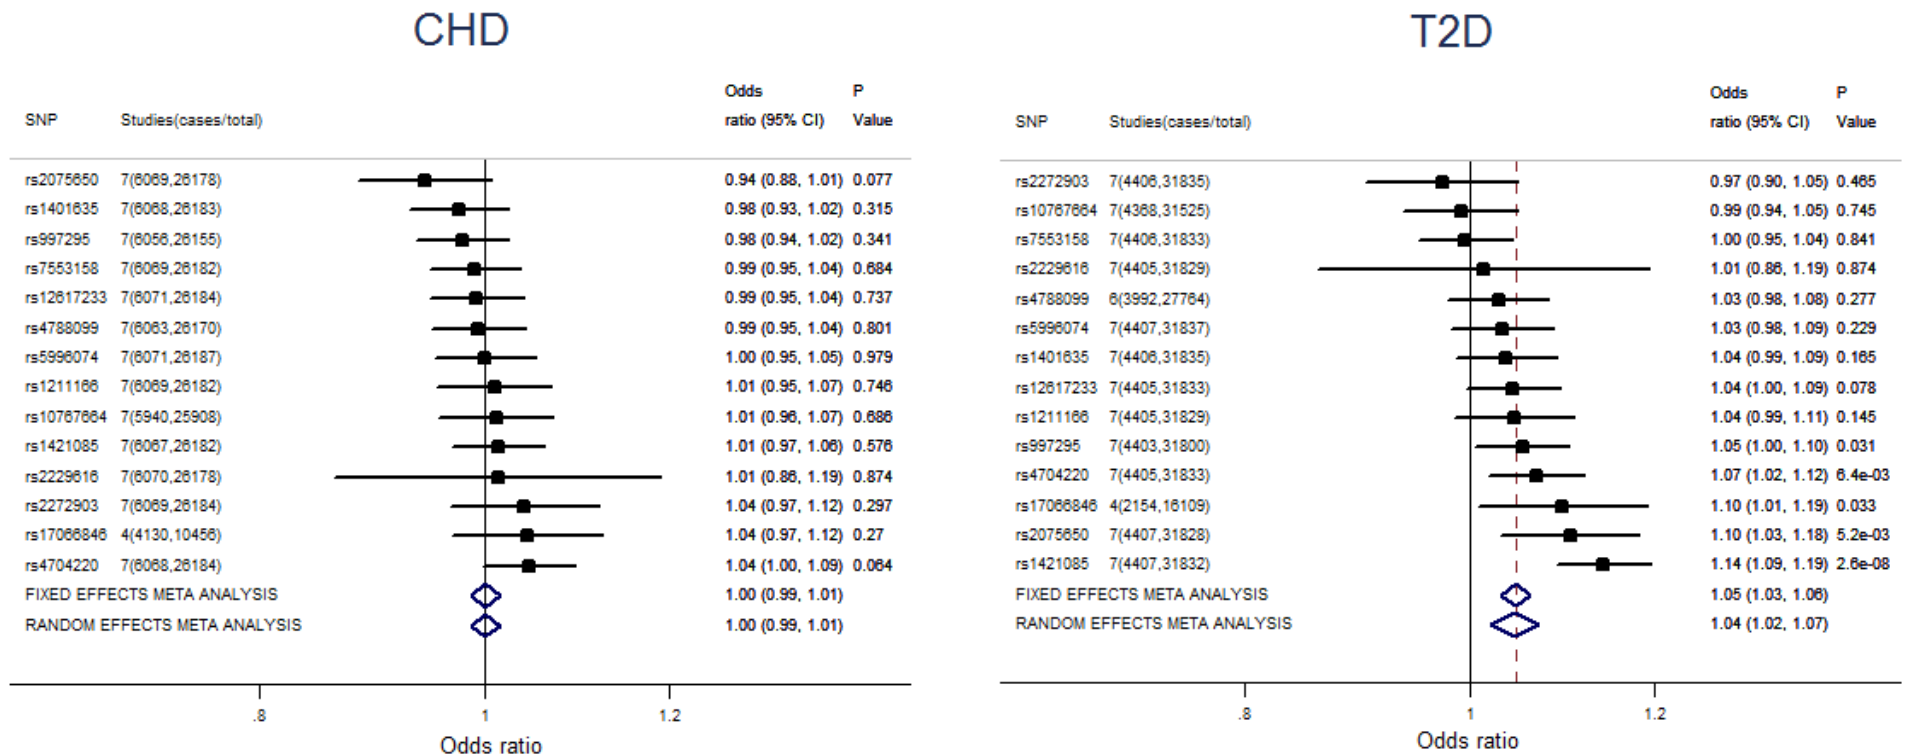

**Table S1. Studies contributing towards the Mendelian randomization analysis**

| Study   | Design              | Geographical region                    | Recruitment design                                   | Year of blood sampling for DNA measurement | Participants included | Sex, % female | Age, mean (SD) | Family structure |
|---------|---------------------|----------------------------------------|------------------------------------------------------|--------------------------------------------|-----------------------|---------------|----------------|------------------|
| ARIC    | Cohort              | USA                                    | Community-based                                      | 1987-1989                                  | 9549                  | 53.5          | 54.28(5.69)    | No               |
| CARDIA  | Cohort              | USA                                    | Community-based                                      | 1995-1996                                  | 1427                  | 53.6          | 25.58(3.37)    | No               |
| CHS     | Cohort              | USA                                    | Community-based                                      | 1992–1993                                  | 3924                  | 56.2          | 72.78(5.60)    | No               |
| EPIC-NL | Nested-case control | Netherlands                            | Population-based                                     | 1993 and 1997                              | 5192                  | 78.1          | 54.05(10.11)   | No               |
| FHS     | Cohort              | USA                                    | Community-based                                      | 1948-present                               | 312                   | 56.4          | 44.43 (10.52)  | Yes <sup>a</sup> |
| MEDAL   | RCT                 | Australia, European, South Africa, USA | Patients with osteoarthritis or rheumatoid arthritis | 2002-2006                                  | 4054                  | 29.2          | 63.21 (8.23)   | No               |
| MESA    | Cohort              | USA                                    | Population                                           | 2000-2002                                  | 2293                  | 52.3          | 62.70 (10.24)  | No               |
| WHI     | RCT and cohort      | USA                                    | Community                                            | 1993-1998                                  | 7787                  | 100           | 67.97(6.59)    | No               |

Footnotes: <sup>a</sup> only the oldest person in each unit was used for analyses

**Table S2. SNPs contributing to the BMI genetic score**

| SNP        | Gene                   | Chromosome | Weights used for gene score <sup>a</sup> |
|------------|------------------------|------------|------------------------------------------|
| rs2229616  | <i>MC4R</i>            | 18q22      | 0.526                                    |
| rs1421085  | <i>FTO</i>             | 16q12.2    | 0.418                                    |
| rs10767664 | <i>BDNF</i>            | 11p13      | 0.202                                    |
| rs2272903  | <i>TFAP2B</i>          | 6p12       | 0.202                                    |
| rs2075650  | <i>TOMM40</i>          | 19q13      | 0.197                                    |
| rs17066846 | <i>MC4R</i>            | 18q22      | 0.179                                    |
| rs4788099  | <i>SH2B1</i>           | 16p11.2    | 0.146                                    |
| rs1211166  | <i>NTRK2</i>           | 9q22.1     | 0.136                                    |
| rs1401635  | <i>BDNF</i>            | 11p13      | 0.136                                    |
| rs12617233 | <i>FANCL/ FLJ30838</i> | 2p16.1     | 0.132                                    |
| rs997295   | <i>MAP2K5</i>          | 15q23      | 0.122                                    |
| rs5996074  | <i>SREBF2</i>          | 22q13      | 0.122                                    |
| rs4704220  | <i>COL4A3BP/ HMGCR</i> | 5q13.3     | 0.118                                    |
| rs7553158  | <i>TNN13K</i>          | 1p31.1     | 0.071                                    |

**Footnote:** <sup>a</sup> beta coefficients obtained from a large-scale gene-centric analysis<sup>1</sup> (originally reported on the per SD scale) were multiplied by 4.7 (obtained from a pooled dataset of 1,462,958 Caucasian individuals<sup>2</sup>) to yield a regression coefficient on the native units (kg/m<sup>2</sup>).

**Table S3. Outcome definitions in the contributing studies**

| Study                                       | Prevalent/incident coronary heart disease                                                                                                                                                                                                                                                                                                                                                                                                                                                                                                                                                                                                                                                                                                                        | Prevalent/ incident stroke                                                                                                                                                        | Prevalent/incident type 2 diabetes                                                                                                                                                                                                                                                                                                                                                                                                                                                                                                                                                                                                                                                                                                                                                                                                                                                                                                                                                                                                                                         |
|---------------------------------------------|------------------------------------------------------------------------------------------------------------------------------------------------------------------------------------------------------------------------------------------------------------------------------------------------------------------------------------------------------------------------------------------------------------------------------------------------------------------------------------------------------------------------------------------------------------------------------------------------------------------------------------------------------------------------------------------------------------------------------------------------------------------|-----------------------------------------------------------------------------------------------------------------------------------------------------------------------------------|----------------------------------------------------------------------------------------------------------------------------------------------------------------------------------------------------------------------------------------------------------------------------------------------------------------------------------------------------------------------------------------------------------------------------------------------------------------------------------------------------------------------------------------------------------------------------------------------------------------------------------------------------------------------------------------------------------------------------------------------------------------------------------------------------------------------------------------------------------------------------------------------------------------------------------------------------------------------------------------------------------------------------------------------------------------------------|
| CARE studies (ARIC, CHS, CARDIA, FHS, MESA) | Prevalent MI was defined as history of MI at first study visit; prevalent MI was adjudicated for ARIC and CHS and self-reported for the FHS and MESA. Adjudicated incident MI status was available for all CARE studies.                                                                                                                                                                                                                                                                                                                                                                                                                                                                                                                                         | Prevalent stroke was defined as self-reported history of stroke at first study visit for all CARE studies. Adjudicated incident stroke status was available for all CARE studies. | Prevalent diabetes was based on diabetes status at first visit for all CARE studies. For ARIC, prevalent diabetes was based on diabetes at first visit defined by a fasting glucose of less than 126 mg/dL or self-report of physician-diagnosed type 2 diabetes. Incident diabetes status was based on self-report of physician-diagnosed diabetes at visits 2-4. For CHS, prevalent diabetes was based on American Diabetes Association (ADA) criteria at visit 1. Incident diabetes was based on diabetes status at visits 3-5, 9 and 10, where diabetes status was determined by either self-report or ADA criteria. Diabetes status was only available for the Framingham Heart Study offspring sub-cohort. Prevalent diabetes was based on self-report physician-diagnosed diabetes at first visit and incident diabetes status was determined using self-report of physician-diagnosed diabetes for visit 2-7. For MESA, prevalent diabetes was determined using ADA criteria at first visit and incident diabetes was determined using ADA criteria at visits 2-4. |
| EPIC-NL                                     | Incident coronary heart disease during follow-up was obtained through linkage with the database of hospital discharge diagnoses from the Dutch National Medical Registry. Mortality information was obtained through linkage with the Cause of Death Registry at Statistics Netherlands. CHD cases were classified as persons with a first event (either fatal or non-fatal of ICD-9:410-414, incl. sub codes 427.5, 798.1, 798.2, 798.9 and ICD-10:I20, I23 t/m I25, incl. all sub codes).                                                                                                                                                                                                                                                                      | N/A                                                                                                                                                                               | N/A                                                                                                                                                                                                                                                                                                                                                                                                                                                                                                                                                                                                                                                                                                                                                                                                                                                                                                                                                                                                                                                                        |
| MEDAL                                       | CHD was classified as clinical history of myocardial infarction, angina pectoris, angioplasty, carotid artery disease, or coronary artery bypass surgery.                                                                                                                                                                                                                                                                                                                                                                                                                                                                                                                                                                                                        | N/A                                                                                                                                                                               | Type 2 Diabetes was defined from self-report of physician-diagnosed status (we note that MEDAL has been used in a previous T2D study <sup>3</sup> and the positive control <i>TCF7L2</i> T2D signal was evident.                                                                                                                                                                                                                                                                                                                                                                                                                                                                                                                                                                                                                                                                                                                                                                                                                                                           |
| WHI                                         | CHD events were defined as nonfatal MI and CHD death initially identified by semi-annual questionnaires followed by central adjudication from medical record review. Definite and probable nonfatal MI required overnight hospitalization and was defined according to an algorithm based on standardized criteria using cardiac pain, cardiac enzymes and troponin levels, and ECG findings. CHD death was defined as death consistent with underlying cause of CHD plus one or more of the following: hospitalization for myocardial infarction within 28 days prior to death, previous angina or myocardial infarction, death due to a procedure related to CHD, or a death certificate consistent with underlying cause of atherosclerotic CHD. <sup>4</sup> | N/A                                                                                                                                                                               | Type 2 Diabetes was defined from self-report of physician-diagnosed status (we note that WHI was also represented in a previous T2D study <sup>3</sup> and the positive control <i>TCF7L2</i> T2D signal was evident.                                                                                                                                                                                                                                                                                                                                                                                                                                                                                                                                                                                                                                                                                                                                                                                                                                                      |

**Table S4. Selection of SNPs for construction of stricter genetic score.**

| <b>SNP</b> | <b>Gene</b>           | <b>Associations of gene in GWAS catalog</b>                                                                       | <b>Included in strict GS? <sup>a</sup></b> |
|------------|-----------------------|-------------------------------------------------------------------------------------------------------------------|--------------------------------------------|
| rs1421085  | <i>FTO</i>            | T2D, BMI, OA, sex hormone binding globulins, Metabolic syndrome, Weight                                           | No                                         |
| rs10767664 | <i>BDNF</i>           | BMI, smoking, weight                                                                                              | No                                         |
| rs2229616  | <i>MC4R</i>           | urate, BMI, BP, height, waist circumference                                                                       | No                                         |
| rs2075650  | <i>TOMM40</i>         | macular degeneration, cognition, CRP, Metabolic syndrome , CVD risk factors, Longevity, Alzheimer's, HDL, LDL, TG | No                                         |
| rs4788099  | <i>SH2B1</i>          | Crohn's disease, BMI, weight                                                                                      | No                                         |
| rs12617233 | <i>FANCL/FLJ30838</i> | Obesity, BMI                                                                                                      | <b>Yes</b>                                 |
| rs2272903  | <i>TFAP2B</i>         | renal function, obesity, Metabolic syndrome, BMI                                                                  | No                                         |
| rs997295   | <i>MAP2K5</i>         | BMI, restless leg syndrome,                                                                                       | No                                         |
| rs4704220  | <i>COL4A3BP/HMGCR</i> | BMI, LDL-C,                                                                                                       | No                                         |
| rs5996074  | <i>SREBF2</i>         | N/A                                                                                                               | <b>Yes</b>                                 |
| rs1211166  | <i>NTRK2</i>          | N/A                                                                                                               | <b>Yes</b>                                 |
| rs17066846 | <i>MC4R</i>           | urate, BMI, BP, height, waist circumference                                                                       | No                                         |
| rs1401635  | <i>BDNF</i>           | BMI, smoking, weight                                                                                              | No                                         |
| rs7553158  | <i>TNN13K</i>         | N/A                                                                                                               | <b>Yes</b>                                 |

**Footnote:** <sup>a</sup> SNPs that associated with additional non-adiposity traits were excluded from the stricter GS.

**Table S5. Instrumental variable (causal) estimates for the relationship of BMI with incident CHD and stroke.**

| <b>Outcome</b>                         | <b>Studies</b> | <b>Cases</b> | <b>Total</b> | <b>Odds ratio<sup>a</sup></b> | <b>Lower 95%CI limit</b> | <b>Upper 95%CI limit</b> |
|----------------------------------------|----------------|--------------|--------------|-------------------------------|--------------------------|--------------------------|
| Coronary heart disease (incident-only) | 6              | 5422         | 24079        | 0.99                          | 0.93                     | 1.07                     |
| Stroke (incident-only)                 | 5              | 3534         | 18680        | 1.04                          | 0.96                     | 1.13                     |

**Footnotes:** <sup>a</sup> estimates represent the causal odds ratio per 1 kg/m<sup>2</sup> increase in BMI



**Table S6. Instrumental variable (causal) estimates for the relationship of BMI with cardiometabolic traits and outcomes adjusted for age and sex.**

| Trait (units)                       | Studies | Cases | Total | Regression coefficient <sup>a</sup> | Lower 95%CI limit | Upper 95%CI limit |
|-------------------------------------|---------|-------|-------|-------------------------------------|-------------------|-------------------|
| Glucose (mmol/l)                    | 6       | N/A   | 20677 | 0.18                                | 0.12              | 0.23              |
| log Insulin (pmol) <sup>b</sup>     | 3       | N/A   | 12758 | 8.59                                | 6.04              | 11.20             |
| log CRP (mg/l) <sup>b</sup>         | 7       | N/A   | 24319 | 12.3                                | 8.24              | 16.51             |
| log IL6 (pg/ml) <sup>b</sup>        | 5       | N/A   | 9885  | 7.47                                | 4.43              | 10.6              |
| log Fibrinogen (g/l) <sup>b</sup>   | 6       | N/A   | 19041 | 1.05                                | 0.38              | 1.73              |
| SBP (mmHg)                          | 6       | N/A   | 30136 | 0.87                                | 0.42              | 1.31              |
| HDL-C (mmol/l)                      | 6       | N/A   | 24943 | -0.012                              | -0.023            | -0.002            |
| LDL-C (mmol/l)                      | 6       | N/A   | 23364 | -0.04                               | -0.06             | -0.01             |
| log TG (mmol/l) <sup>b</sup>        | 6       | N/A   | 24761 | 0.80                                | -0.62             | 2.24              |
| log cIMT (mm) <sup>b</sup>          | 3       | N/A   | 6260  | 1.38                                | -0.08             | 2.85              |
| Outcome                             | Studies | Cases | Total | Odds ratio <sup>a</sup>             | Lower 95%CI limit | Upper 95%CI limit |
| Type 2 diabetes                     | 7       | 4407  | 31844 | 1.28                                | 1.19              | 1.38              |
| Coronary heart disease              | 7       | 6073  | 26193 | 1.02                                | 0.95              | 1.09              |
| Coronary heart disease <sup>c</sup> | 6       | 4161  | 21610 | 1.04                                | 0.96              | 1.14              |
| Stroke                              | 6       | 3813  | 23782 | 1.05                                | 0.96              | 1.14              |
| Lipid lowering therapy              | 5       | 2999  | 24980 | 0.94                                | 0.85              | 1.05              |

**Footnotes:** <sup>a</sup> Values represent instrumental variable (causal) estimates for the effect of a 1 kg/m<sup>2</sup> increase in BMI. <sup>b</sup> for log-transformed variables, the regression coefficients are presented as a percentage difference in the geometric mean. <sup>c</sup> additionally adjusted for LDL-C.

**Table S7. Instrumental variable (causal) estimates for the relationship of BMI with incident CHD and stroke using a stricter GS.**

| <b>Outcome</b>         | <b>Studies</b> | <b>Cases</b> | <b>Total</b> | <b>Odds ratio<sup>a</sup></b> | <b>Lower 95%CI limit</b> | <b>Upper 95%CI limit</b> |
|------------------------|----------------|--------------|--------------|-------------------------------|--------------------------|--------------------------|
| T2D                    | 7              | 4407         | 31844        | 1.24                          | 1.01                     | 1.52                     |
| Coronary heart disease | 7              | 6073         | 26193        | 1.00                          | 0.82                     | 1.20                     |
| Stroke                 | 6              | 3813         | 23782        | 1.05                          | 0.83                     | 1.32                     |

**Footnotes:** <sup>a</sup> estimates represent the causal odds ratio per 1 kg/m<sup>2</sup> increase in BMI

**Table S8. Consistency of estimates derived from instrumental variable analysis in Mendelian randomization studies.**

| Study, first name (reference)               | Evidence for causality<br>(↑= positive; ↓= negative; X = none; n/a not analysed) |                         |                                                |                                |                                |                             |                             |                             | Consistent evidence across studies?<br>(Y=yes, N=no) |
|---------------------------------------------|----------------------------------------------------------------------------------|-------------------------|------------------------------------------------|--------------------------------|--------------------------------|-----------------------------|-----------------------------|-----------------------------|------------------------------------------------------|
|                                             | Holmes et al (present study)                                                     | Fall et al <sup>5</sup> | Nordestgaard et al <sup>6</sup>                | Welsh et al <sup>7</sup>       | Timpson et al <sup>8</sup>     | Kivimaki et al <sup>9</sup> | Timpson et al <sup>10</sup> | Freathy et al <sup>11</sup> |                                                      |
| Sample size                                 | 34,538                                                                           | 198,502                 | 75,627                                         | 5804                           | 36,867                         | 2230                        | 21,836                      | 16,639                      |                                                      |
| # of SNPs for BMI genetic instrument (gene) | 14 (see Table S2)                                                                | 1 ( <i>FTO</i> )        | 3 ( <i>FTO</i> , <i>MC4R</i> , <i>TMEM18</i> ) | 2 ( <i>FTO</i> , <i>MC4R</i> ) | 2 ( <i>FTO</i> , <i>MC4R</i> ) | 1 ( <i>FTO</i> )            | 1 ( <i>FTO</i> )            | 1 ( <i>FTO</i> )            |                                                      |
| R <sup>2</sup> /F-statistic                 | 0.8%/237                                                                         | Not reported            | Not reported                                   | Not reported                   | F>60                           | R <sup>2</sup> =0.4%        | F=31.1                      | Not reported                |                                                      |
| Ethnicity                                   | Caucasian                                                                        | Caucasian               | Caucasian                                      | Caucasian                      | Caucasian                      | Caucasian                   | Caucasian                   | Caucasian                   |                                                      |
| <b>Cardio-metabolic traits</b>              |                                                                                  |                         |                                                |                                |                                |                             |                             |                             |                                                      |
| Fasting glucose                             | ↑                                                                                | X                       | n/a                                            | n/a                            | n/a                            | X / ↑ <sup>a</sup>          | n/a                         | ↑                           | N                                                    |
| Insulin                                     | ↑                                                                                | ↑                       | n/a                                            | n/a                            | n/a                            | n/a                         | n/a                         | ↑                           | Y                                                    |
| CRP                                         | ↑                                                                                | ↑                       | n/a                                            | ↑                              | n/a                            | n/a                         | ↑                           | n/a                         | Y                                                    |
| IL6                                         | ↑                                                                                | X                       | n/a                                            | n/a                            | n/a                            | n/a                         | n/a                         | n/a                         | N                                                    |
| Fibrinogen                                  | ↑                                                                                | n/a                     | n/a                                            | n/a                            | n/a                            | n/a                         | n/a                         | n/a                         | n/a                                                  |
| HDL-C                                       | ↓                                                                                | ↓                       | n/a                                            | n/a                            | n/a                            | n/a                         | n/a                         | ↓                           | Y                                                    |
| LDL-C                                       | ↓                                                                                | X                       | n/a                                            | n/a                            | n/a                            | n/a                         | n/a                         | n/a                         | N                                                    |
| Triglycerides                               | X                                                                                | n/a                     | n/a                                            | n/a                            | n/a                            | n/a                         | n/a                         | ↑                           | N                                                    |
| SBP                                         | ↑                                                                                | ↑                       | n/a                                            | n/a                            | ↑                              | ↑ / ↑ <sup>a</sup>          | n/a                         | n/a                         | Y                                                    |
| DBP                                         | ↑                                                                                | ↑                       | n/a                                            | n/a                            | ↑                              | n/a                         | n/a                         | n/a                         | Y                                                    |
| cIMT                                        | X                                                                                | n/a                     | n/a                                            | n/a                            | n/a                            | X / ↑ <sup>a</sup>          | n/a                         | n/a                         | N                                                    |
| <b>Events</b>                               |                                                                                  |                         |                                                |                                |                                |                             |                             |                             |                                                      |
| T2D                                         | ↑                                                                                | ↑                       | n/a                                            | n/a                            | n/a                            | n/a                         | n/a                         | n/a                         | Y                                                    |
| CHD                                         | X                                                                                | X                       | ↑                                              | n/a                            | n/a                            | n/a                         | n/a                         | n/a                         | N                                                    |
| Stroke                                      | X                                                                                | X                       | n/a                                            | n/a                            | n/a                            | n/a                         | Y                           | n/a                         | Y                                                    |

**Footnotes:** <sup>a</sup> First estimate refers to patient data, second refers to simulated data (e.g. X/↑ means that in the participant data, no evidence was found, whereas in simulated data, a positive association between BMI and the trait emerged). N/a: not applicable (not investigated).

## Supplemental References

1. Guo, Y., Lanktree, M.B., Taylor, K.C., Hakonarson, H., Lange, L.A., and Keating, B.J. (2013). Gene-centric meta-analyses of 108 912 individuals confirm known body mass index loci and reveal three novel signals. *Hum Mol Genet* 22, 184-201.
2. Berrington de Gonzalez, A., Hartge, P., Cerhan, J.R., Flint, A.J., Hannan, L., MacInnis, R.J., Moore, S.C., Tobias, G.S., Anton-Culver, H., Freeman, L.B., et al. (2010). Body-mass index and mortality among 1.46 million white adults. *N Engl J Med* 363, 2211-2219.
3. Saxena, R., Elbers, C.C., Guo, Y., Peter, I., Gaunt, T.R., Mega, J.L., Lanktree, M.B., Tare, A., Castillo, B.A., Li, Y.R., et al. (2012). Large-scale gene-centric meta-analysis across 39 studies identifies type 2 diabetes loci. *Am J Hum Genet* 90, 410-425.
4. Curb, J.D., McTiernan, A., Heckbert, S.R., Kooperberg, C., Stanford, J., Nevitt, M., Johnson, K.C., Proulx-Burns, L., Pastore, L., Criqui, M., et al. (2003). Outcomes ascertainment and adjudication methods in the Women's Health Initiative. *Ann Epidemiol* 13, S122-128.
5. Fall, T., Hagg, S., Magi, R., Ploner, A., Fischer, K., Horikoshi, M., Sarin, A.P., Thorleifsson, G., Ladenvall, C., Kals, M., et al. (2013). The role of adiposity in cardiometabolic traits: a mendelian randomization analysis. *PLoS Med* 10, e1001474.
6. Nordestgaard, B.G., Palmer, T.M., Benn, M., Zacho, J., Tybjaerg-Hansen, A., Davey Smith, G., and Timpson, N.J. (2012). The effect of elevated body mass index on ischemic heart disease risk: causal estimates from a Mendelian randomisation approach. *PLoS Med* 9, e1001212.
7. Welsh, P., Polisecki, E., Robertson, M., Jahn, S., Buckley, B.M., de Craen, A.J., Ford, I., Jukema, J.W., Macfarlane, P.W., Packard, C.J., et al. (2010). Unraveling the directional link between adiposity and inflammation: a bidirectional Mendelian

- randomization approach. *The Journal of clinical endocrinology and metabolism* 95, 93-99.
8. Timpson, N.J., Harbord, R., Davey Smith, G., Zacho, J., Tybjaerg-Hansen, A., and Nordestgaard, B.G. (2009). Does greater adiposity increase blood pressure and hypertension risk?: Mendelian randomization using the FTO/MC4R genotype. *Hypertension* 54, 84-90.
  9. Kivimaki, M., Davey Smith, G., Timpson, N.J., Lawlor, D.A., Batty, G.D., Kahonen, M., Juonala, M., Ronnema, T., Viikari, J.S., Lehtimaki, T., et al. (2008). Lifetime body mass index and later atherosclerosis risk in young adults: examining causal links using Mendelian randomization in the Cardiovascular Risk in Young Finns study. *European heart journal* 29, 2552-2560.
  10. Timpson, N.J., Nordestgaard, B.G., Harbord, R.M., Zacho, J., Frayling, T.M., Tybjaerg-Hansen, A., and Davey Smith, G. (2011). C-reactive protein levels and body mass index: elucidating direction of causation through reciprocal Mendelian randomization. *International journal of obesity* 35, 300-308.
  11. Freathy, R.M., Timpson, N.J., Lawlor, D.A., Pouta, A., Ben-Shlomo, Y., Ruukonen, A., Ebrahim, S., Shields, B., Zeggini, E., Weedon, M.N., et al. (2008). Common variation in the FTO gene alters diabetes-related metabolic traits to the extent expected given its effect on BMI. *Diabetes* 57, 1419-1426.
